# Supplementary material for: Impact of the Drying Procedure and Botanical Origin on the Physico-Chemical and Potentially Bioactive Properties of Honey Powders
Source: MDPI journal article supplement (doi:10.3390/foods12213990), 2023-10-31
Supplement: s1 [file s1]

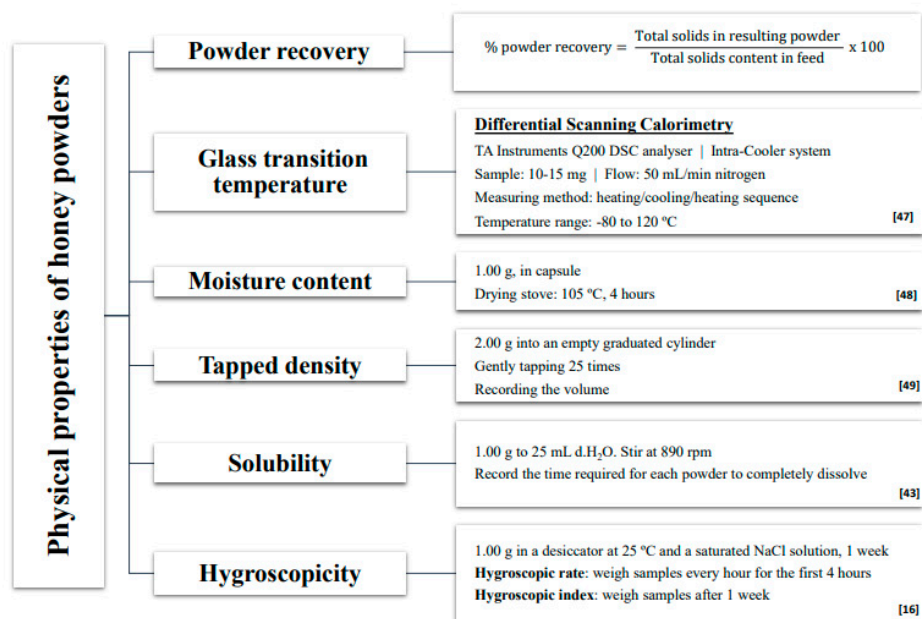

Figure S1. Physical properties of honey powders [16,43,47–49].

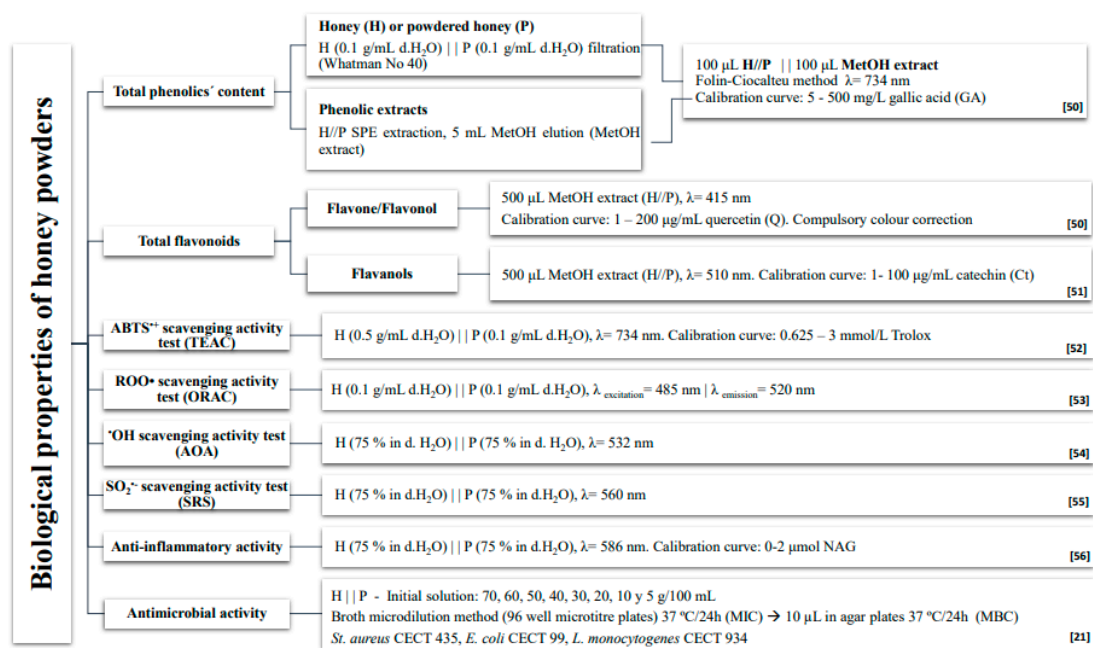

Figure S2. Biological properties of honey powders [21,50–56].

**Table S1.** Abbreviation's list

|                                                                    |
|--------------------------------------------------------------------|
| ABTS: 2,2'-azino-bis(3-ethylbenzothiazoline-6-sulphonic acid)      |
| ANOVA: Analysis of variance                                        |
| AOA: Hydroxyl radical-scavenging activity                          |
| A <sub>w</sub> : water activity                                    |
| Ct: catechin                                                       |
| FZ: Freeze drying                                                  |
| LHP: Ling-heather honey powders                                    |
| LV: Lavender honey                                                 |
| LVP: Lavender powder honey                                         |
| M: Multifloral honey                                               |
| MBC: Minimal bactericide concentration                             |
| MD: Maltodextrin                                                   |
| MP: Multifloral powder honey                                       |
| ORAC: Oxygen radical absorbance capacity                           |
| P: honey powder                                                    |
| PCA: Principal component analysis                                  |
| Q: Quercetin                                                       |
| SP: Spray drying                                                   |
| SRS: Superoxide radical-scavenging activity                        |
| T: Trolox (6-hydroxy-2,5,7,8-tetramethylchroman-2-carboxylic acid) |
| TEAC: Trolox equivalent antioxidant capacity                       |
| TFC: Total flavonoids content                                      |
| TFC <sub>c</sub> : Total flavanols                                 |
| TFC <sub>o</sub> : Total flavones/flavonols                        |
| T <sub>g</sub> : Glass transition temperatures                     |
| TH: Thyme honey                                                    |
| THP: Thyme powder honey                                            |
| TPC: Total phenolic content                                        |
| TPC-E: Total phenolic content in extract                           |
| V: Vetch honey                                                     |
| VC: Vacuum drying                                                  |
| VP: Vetch powder honey                                             |
